# Supplementary material for: Double-wall carbon nanotube transparent conductive films with excellent performance
Source: Royal Society of Chemistry journal article supplement (doi:10.1039/c3ta13685j), 2013-11-12
Supplement: c3ta13685j.pdf [file c3ta13685j.pdf]

**Supplementary Information for:**

**Double-wall carbon nanotube transparent conductive films with excellent performance**

Peng-Xiang Hou‡, Bing Yu‡, Yang Su, Chao Shi, Lili Zhang, Chang Liu\*, ShiSheng Li, Jin-Hong Du, and Hui-Ming Cheng

Shenyang National Laboratory for Materials Science, Institute of Metal Research, Chinese

Academy of Sciences, Shenyang 110016, PR China

*Fax: 86-24-23903126 ; Tel: 86-24-83978280 ; E-mail: [cliu@imr.ac.cn](mailto:cliu@imr.ac.cn)*

‡These authors are equal major contributors.

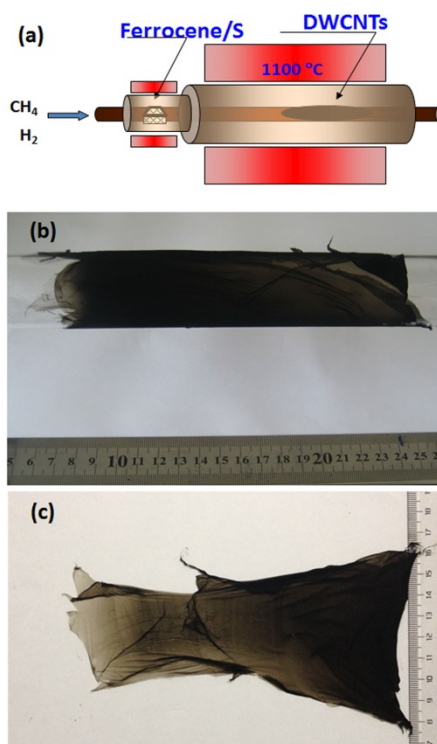

**Figure S1.** (a) Schematic showing the setup and growth process of the DWCNTs. (b-c) Optical photographs showing the size and morphology of the as-synthesized DWCNT samples.

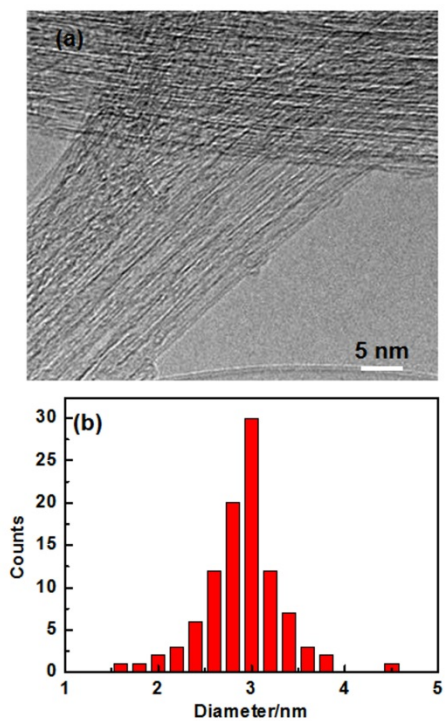

**Figure S2.** (a) Typical TEM image of the p-DWCNTs; (b) Diameter distribution of the p-DWCNTs measured from TEM observations.

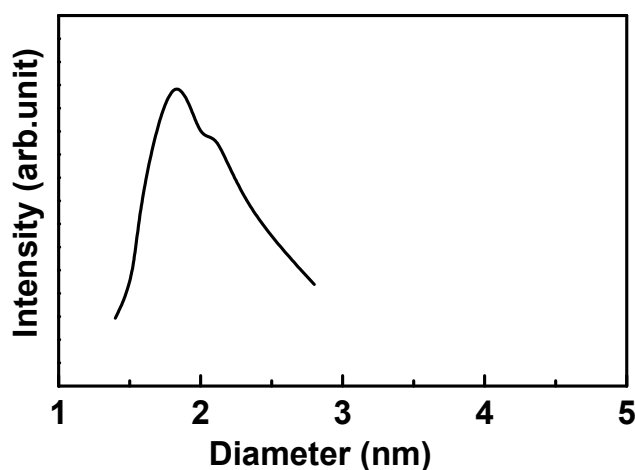

**Figure S3.** Diameter distribution of the DWCNTs plotted from Raman spectra excited by a 633 nm laser [1]

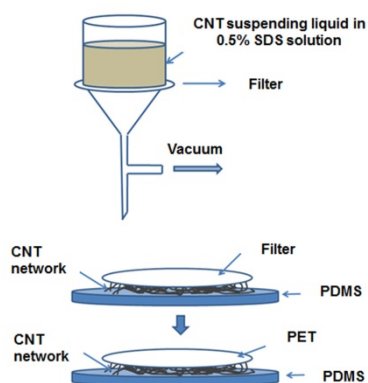

**Figure S4.** A flowchart showing the preparation of TCFs by a filtration method.

### S1. Preparation of SWCNTs and SWCNT-TCFs.

SWCNTs were prepared by a FCCVD method similar with that of DWCNTs but different growth conditions.

Simply, SWCNTs were synthesized at 1100 °C using sulfur as growth promoter and CH<sub>4</sub> as carbon source under a hydrogen atmosphere. In a typical experiment, 200 sccm H<sub>2</sub> flowed into a quartz tube reactor with a diameter of

50 mm. When the temperature of the reactor was increased to 1100 °C, a mixture of ferrocene and 0.5 wt % sulfur powder was pushed to a position inside the reactor with a temperature of 100 °C and was transported into the reaction zone by a 1000 sccm H<sub>2</sub> gas flow. Then 20 sccm CH<sub>4</sub> flow was introduced into the reactor. The process lasted for 30 min. Finally, the reactor was cooled to room temperature naturally. A membrane-like product was collected from the inner wall of the reactor. The as-prepared SWCNTs were purified using the same procedure for purifying DWCNTs, and the obtained SWCNTs are denoted F-SWCNTs. The synthesis and treatment procedure for SWCNT TCFs are identical to that of DWCNT TCFs.

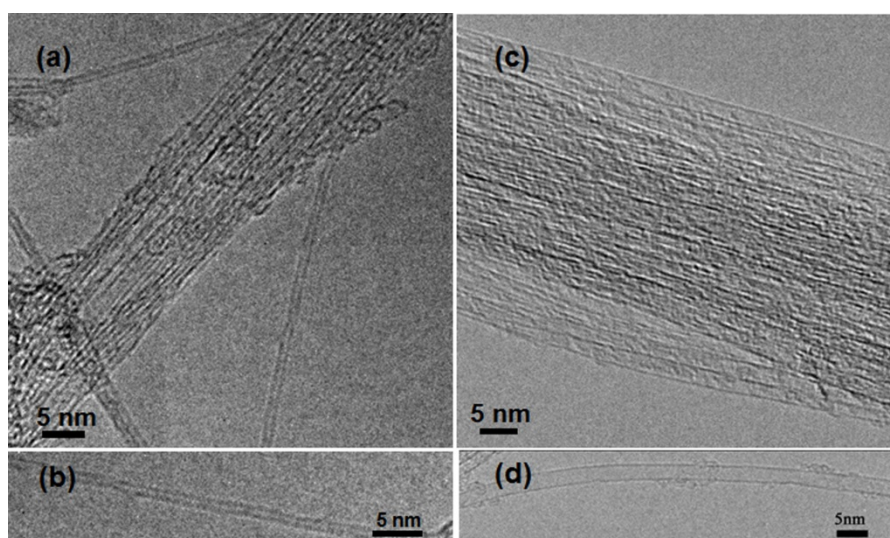

**Figure S5.** Typical TEM images of H-SWCNTs (a) and F-SWCNTs (b).

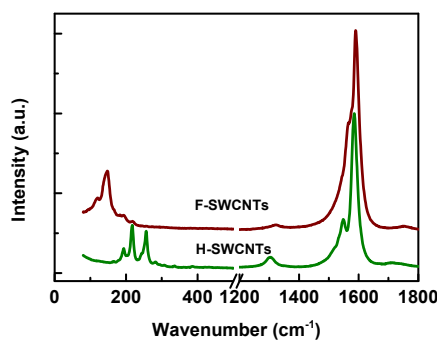

**Figure S6.** Typical Raman spectra of H-SWCNTs and F-SWCNTs with an excitation laser wavelength of 633 nm

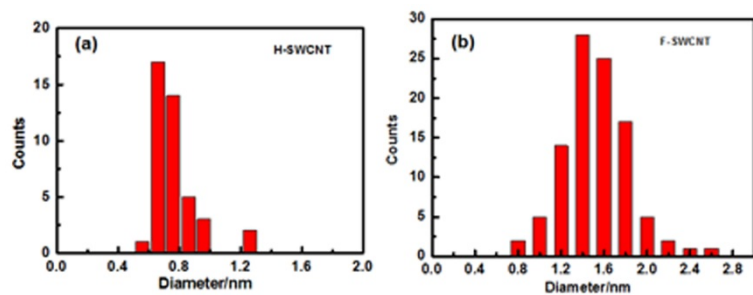

**Figure S7.** Diameter distribution of the H-SWCNTs (a) and F-SWCNTs (b) measured from TEM observations

## References

1. M. Endo, Y. A. Kim, T. Hayashi, H. Muramatsu, M. Terrones, R. Saito, F. Villalpando-Paez, S. G. Chou and M. S. Dresselhaus, *Small* 2006, **2**, 1031.
